# Supplementary material for: Identification of Microbiota Biomarkers With Orthologous Gene Annotation for Type 2 Diabetes
Source: Front Microbiol. 2021 Jul 9;12:711244. doi: 10.3389/fmicb.2021.711244 (PMC8299781; doi:10.3389/fmicb.2021.711244)
Supplement: Supplementary Table 2 — Ranked KO features by mRMR. [file Table_2.XLSX]

## Sheet: Sheet1
Rank	Feature
1	K00244
2	K14744
3	K03367
4	K03201
5	K01006
6	K12057
7	K02440
8	K05341
9	K12950
10	K07314
11	K13735
12	K07402
13	K15257
14	K12056
15	K11904
16	K01958
17	K02422
18	K08965
19	K12059
20	K04656
21	K00867
22	K10762
23	K01708
24	K12685
25	K03194
26	K01160
27	K03750
28	K05793
29	K15515
30	K15503
31	K13006
32	K03204
33	K07047
34	K12204
35	K12994
36	K12063
37	K03304
38	K04567
39	K06877
40	K08357
41	K02416
42	K07326
43	K09121
44	K07347
45	K12527
46	K00122
47	K02362
48	K15509
49	K12209
50	K00844
51	K04030
52	K12687
53	K15656
54	K01838
55	K00108
56	K02033
57	K01457
58	K03552
59	K01185
60	K12681
61	K14949
62	K12217
63	K07683
64	K11104
65	K00087
66	K13774
67	K09584
68	K04023
69	K10939
70	K00692
71	K03833
72	K08217
73	K00480
74	K05521
75	K06889
76	K10906
77	K08669
78	K11015
79	K03759
80	K01125
81	K07789
82	K05364
83	K07110
84	K10843
85	K01595
86	K02529
87	K02510
88	K04058
89	K11312
90	K08369
91	K01049
92	K10794
93	K12218
94	K07226
95	K07054
96	K09774
97	K02609
98	K06978
99	K15664
100	K01043
101	K02113
102	K06903
103	K00842
104	K01902
105	K01791
106	K09685
107	K03608
108	K01390
109	K07566
110	K06320
111	K03722
112	K00958
113	K11062
114	K12206
115	K03739
116	K00595
117	K06338
118	K11940
119	K04561
120	K11907
121	K13927
122	K03277
123	K06888
124	K02046
125	K12940
126	K01429
127	K05658
128	K12203
129	K06998
130	K02938
131	K06418
132	K14414
133	K12460
134	K03668
135	K03200
136	K13953
137	K09689
138	K01687
139	K15642
140	K08969
141	K04412
142	K00372
143	K02014
144	K06886
145	K13928
146	K08177
147	K00899
148	K02987
149	K01754
150	K00710
151	K09019
152	K12055
153	K06426
154	K13479
155	K12522
156	K02745
157	K12061
158	K03723
159	K09683
160	K00627
161	K07217
162	K06201
163	K11912
164	K10896
165	K03399
166	K07469
167	K01003
168	K00955
169	K09471
170	K13420
171	K08314
172	K07746
173	K05819
174	K01739
175	K07480
176	K06076
177	K01451
178	K06401
179	K00370
180	K03198
181	K06400
182	K11910
183	K02314
184	K07467
185	K00938
186	K05667
187	K03702
188	K01152
189	K02668
190	K03931
191	K03311
192	K11107
193	K02877
194	K02246
195	K06926
196	K09487
197	K15654
198	K03885
199	K00050
200	K01430
201	K11216
202	K03215
203	K00978
204	K07279
205	K10811
206	K02784
207	K09729
208	K01256
209	K13796
210	K00045
211	K03383
212	K03521
213	K02318
214	K09139
215	K14989
216	K00864
217	K06152
218	K02389
219	K12368
220	K14445
221	K03557
222	K11635
223	K10793
224	K08368
225	K01099
226	K11610
227	K11442
228	K14673
229	K06905
230	K05914
231	K02476
232	K15598
233	K07603
234	K00681
235	K09923
236	K11958
237	K10229
238	K02191
239	K11624
240	K03742
241	K02324
242	K10116
243	K12058
244	K07693
245	K07340
246	K02020
247	K06823
248	K08256
249	K10977
250	K07222
251	K01244
252	K00527
253	K08168
254	K07141
255	K03895
256	K10000
257	K02411
258	K03646
259	K00827
260	K03006
261	K03856
262	K04801
263	K02487
264	K11005
265	K00412
266	K11153
267	K09961
268	K01501
269	K00395
270	K03043
271	K15421
272	K09922
273	K06015
274	K03894
275	K11710
276	K07739
277	K07333
278	K00031
279	K11911
280	K05020
281	K12372
282	K15663
283	K08567
284	K00870
285	K02007
286	K04422
287	K08722
288	K11539
289	K12064
290	K04844
291	K02018
292	K15579
293	K12212
294	K07134
295	K12371
296	K02551
297	K02624
298	K12172
299	K06331
300	K14489
301	K07793
302	K01434
303	K08652
304	K08104
305	K02337
306	K12276
307	K07820
308	K01790
309	K01592
310	K02012
311	K02779
312	K00055
313	K07026
314	K10382
315	K10682
316	K02794
317	K15419
318	K00333
319	K07356
320	K11089
321	K11752
322	K12196
323	K09984
324	K03493
325	K07355
326	K07088
327	K06216
328	K15353
329	K13659
330	K14660
331	K11786
332	K01996
333	K02962
334	K01643
335	K03554
336	K05931
337	K11014
338	K15922
339	K01263
340	K02006
341	K00371
342	K12997
343	K12072
344	K14811
345	K01428
346	K10061
347	K14103
348	K09924
349	K06601
350	K00929
351	K07647
352	K11013
353	K03887
354	K14001
355	K01738
356	K03746
357	K06607
358	K03263
359	K11634
360	K12583
361	K04308
362	K01999
363	K15895
364	K01143
365	K13205
366	K07128
367	K13380
368	K13008
369	K10705
370	K10222
371	K01464
372	K15475
373	K09140
374	K15675
375	K03798
376	K02364
377	K06893
378	K02796
379	K12060
380	K07156
381	K00265
382	K11594
383	K01957
384	K07174
385	K12517
386	K01281
387	K02017
388	K13287
389	K07352
390	K06269
391	K11896
392	K04785
393	K00962
394	K08780
395	K13613
396	K10840
397	K07018
398	K04026
399	K12237
400	K03581
401	K02379
402	K01459
403	K12441
404	K06617
405	K15396
406	K01300
407	K02049
408	K10455
409	K07978
410	K10577
411	K09151
412	K02168
413	K08059
414	K08744
415	K09700
416	K03403
417	K09892
418	K06337
419	K10396
420	K03308
421	K06305
422	K07353
423	K12444
424	K06160
425	K01214
426	K08795
427	K00359
428	K03197
429	K10439
430	K14066
431	K14979
432	K11016
433	K06027
434	K03645
435	K05826
436	K07878
437	K11202
438	K11229
439	K10014
440	K01641
441	K10535
442	K10353
443	K03935
444	K06063
445	K12520
446	K07132
447	K03315
448	K09959
449	K10209
450	K05906
451	K07690
452	K06898
453	K01905
454	K09943
455	K07662
456	K09695
457	K03203
458	K03032
459	K07769
460	K06929
461	K08836
462	K04796
463	K03656
464	K02973
465	K10440
466	K02663
467	K11208
468	K08973
469	K02727
470	K13921
471	K00567
472	K03791
473	K02490
474	K02261
475	K02241
476	K02688
477	K02689
478	K09704
479	K02331
480	K02075
481	K02650
482	K14267
483	K01448
484	K00309
485	K05927
486	K03878
487	K02072
488	K07733
489	K11708
490	K09510
491	K00219
492	K11337
493	K05922
494	K11443
495	K00356
496	K00907
497	K07775
498	K01766
499	K05850
500	K02657
501	K00384
502	K03080
503	K11180
504	K05803
505	K01896
506	K02248
507	K03195
508	K09964
509	K02081
510	K00413
511	K07977
512	K00407
513	K08344
514	K11690
515	K11338
516	K06282
517	K02771
518	K09730
519	K09907
520	K13663
521	K06436
522	K00406
523	K11927
524	K01904
525	K07182
526	K02783
527	K11806
528	K13500
529	K10837
530	K00405
531	K07159
532	K08589
533	K08304
534	K01210
535	K01392
536	K00135
537	K07273
538	K07777
539	K00404
540	K01639
541	K07821
542	K13020
543	K09158
544	K01607
545	K12581
546	K02986
547	K08955
548	K07741
549	K06026
550	K08097
551	K02150
552	K05573
553	K01295
554	K06236
555	K00694
556	K02465
557	K14727
558	K06937
559	K00435
560	K09016
561	K13799
562	K14059
563	K00830
564	K09580
565	K12144
566	K14446
567	K14155
568	K05910
569	K11474
570	K01800
571	K03491
572	K12214
573	K02418
574	K02030
575	K15790
576	K07083
577	K03740
578	K15373
579	K02015
580	K06413
581	K13285
582	K13936
583	K03298
584	K07234
585	K03710
586	K13754
587	K00101
588	K03879
589	K05568
590	K12227
591	K11963
592	K05777
593	K12071
594	K06603
595	K06609
596	K13677
597	K00385
598	K07008
599	K09527
600	K13381
601	K06694
602	K06034
603	K10297
604	K03073
605	K08967
606	K03293
607	K01590
608	K10800
609	K02205
610	K07012
611	K07036
612	K01654
613	K13818
614	K02554
615	K08900
616	K12205
617	K01933
618	K07401
619	K10858
620	K02035
621	K07535
622	K07395
623	K09795
624	K03563
625	K02656
626	K05550
627	K12228
628	K12062
629	K01952
630	K07126
631	K00914
632	K03676
633	K04568
634	K03897
635	K03637
636	K03238
637	K14855
638	K11191
639	K03936
640	K06381
641	K07782
642	K05372
643	K04086
644	K04781
645	K07749
646	K00534
647	K05714
648	K01681
649	K03942
650	K06894
651	K02506
652	K02420
653	K03303
654	K09495
655	K02597
656	K13689
657	K15120
658	K02051
659	K02596
660	K06994
661	K07499
662	K02595
663	K02901
664	K04065
665	K06872
666	K12370
667	K02651
668	K06391
669	K02593
670	K11029
671	K03502
672	K15279
673	K03489
674	K06685
675	K01732
676	K14400
677	K01731
678	K10799
679	K00863
680	K02391
681	K11192
682	K04653
683	K05360
684	K12211
685	K02042
686	K09699
687	K01721
688	K11493
689	K03392
690	K01576
691	K05853
692	K00001
693	K03635
694	K12268
695	K02407
696	K01289
697	K01938
698	K01355
699	K00481
700	K01239
701	K07484
702	K00449
703	K12150
704	K15632
705	K00737
706	K00448
707	K04780
708	K07138
709	K02787
710	K12813
711	K02073
712	K14287
713	K07498
714	K00739
715	K02016
716	K08728
717	K01083
718	K01436
719	K00368
720	K00657
721	K04484
722	K02547
723	K05668
724	K15524
725	K00983
726	K05774
727	K11961
728	K08987
729	K13772
730	K10594
731	K07243
732	K01202
733	K07688
734	K11915
735	K07119
736	K01903
737	K12684
738	K11827
739	K08092
740	K09981
741	K02077
742	K00027
743	K12142
744	K03433
745	K02880
746	K06144
747	K13770
748	K12287
749	K07571
750	K01075
751	K02450
752	K07389
753	K02019
754	K05962
755	K14656
756	K02957
757	K09900
758	K06985
759	K07374
760	K06138
761	K01706
762	K12995
763	K02940
764	K03169
765	K15192
766	K11719
767	K06968
768	K02788
769	K00989
770	K08853
771	K02167
772	K15305
773	K03412
774	K01156
775	K13256
776	K02146
777	K07199
778	K06078
779	K11884
780	K02778
781	K13573
782	K04013
783	K09023
784	K13412
785	K07787
786	K14127
787	K02459
788	K13001
789	K01618
790	K03492
791	K01247
792	K05577
793	K06211
794	K06883
795	K13276
796	K00033
797	K08170
798	K01725
799	K09940
800	K12614
801	K05351
802	K10866
803	K11176
804	K03366
805	K13815
806	K02003
807	K02680
808	K02655
809	K12450
810	K15497
811	K15032
812	K03852
813	K01574
814	K13570
815	K14591
816	K02993
817	K05356
818	K12309
819	K06956
820	K02236
821	K10711
822	K01250
823	K06252
824	K01577
825	K06884
826	K11631
827	K06951
828	K03657
829	K06206
830	K06560
831	K03339
832	K12069
833	K06240
834	K02458
835	K13487
836	K11707
837	K00574
838	K07198
839	K13053
840	K08358
841	K01907
842	K06934
843	K12145
844	K03105
845	K01608
846	K03095
847	K10746
848	K05944
849	K07386
850	K14587
851	K07399
852	K12549
853	K03312
854	K02812
855	K14191
856	K09896
857	K11253
858	K12941
859	K12066
860	K02401
861	K11897
862	K02908
863	K06908
864	K07456
865	K03301
866	K12519
867	K07592
868	K04498
869	K15830
870	K09933
871	K15710
872	K05303
873	K03205
874	K04334
875	K07266
876	K09975
877	K13049
878	K12982
879	K13018
880	K10060
881	K07575
882	K06931
883	K15046
884	K02540
885	K03882
886	K00561
887	K05822
888	K00754
889	K04067
890	K02941
891	K03752
892	K09650
893	K01053
894	K04081
895	K11384
896	K01699
897	K08971
898	K08223
899	K14555
900	K02979
901	K13731
902	K00984
903	K03851
904	K03743
905	K03953
906	K09860
907	K04075
908	K07116
909	K12164
910	K12567
911	K06906
912	K00889
913	K11909
914	K03934
915	K01998
916	K09930
917	K12689
918	K08272
919	K02347
920	K14981
921	K09004
922	K00111
923	K14160
924	K09507
925	K10530
926	K02398
927	K11121
928	K15836
929	K01473
930	K09799
931	K03941
932	K03449
933	K15831
934	K04059
935	K09684
936	K02589
937	K10085
938	K01969
939	K03189
940	K02355
941	K08720
942	K01913
943	K01090
944	K13584
945	K03963
946	K07496
947	K03119
948	K15974
949	K08320
950	K11616
951	K03566
952	K04071
953	K04069
954	K07516
955	K00967
956	K06215
957	K07778
958	K12393
959	K07487
960	K07250
961	K00619
962	K03299
963	K14274
964	K11161
965	K02750
966	K07160
967	K13998
968	K11044
969	K15256
970	K00432
971	K10848
972	K09934
973	K13766
974	K03837
975	K10549
976	K11422
977	K08345
978	K02250
979	K03057
980	K01899
981	K01104
982	K00026
983	K07709
984	K03225
985	K08281
986	K05580
987	K00059
988	K12067
989	K03107
990	K10975
991	K00548
992	K10395
993	K01991
994	K03599
995	K02201
996	K09723
997	K08777
998	K00613
999	K13155
1000	K00049
1001	K02004
1002	K15640
1003	K08253
1004	K13788
1005	K01520
1006	K08975
1007	K03576
1008	K13252
1009	K02664
1010	K03884
1011	K03097
1012	K05592
1013	K03223
1014	K09824
1015	K09469
1016	K01518
1017	K07105
1018	K10827
1019	K02859
1020	K15461
1021	K01132
1022	K06184
1023	K02749
1024	K01118
1025	K13950
1026	K09789
1027	K09474
1028	K13480
1029	K11533
1030	K00975
1031	K13582
1032	K05304
1033	K13489
1034	K13207
1035	K02244
1036	K02567
1037	K08979
1038	K00283
1039	K10614
1040	K03516
1041	K14098
1042	K13930
1043	K11787
1044	K02525
1045	K02872
1046	K02782
1047	K15328
1048	K02218
1049	K03292
1050	K03984
1051	K07157
1052	K05733
1053	K01419
1054	K01293
1055	K01274
1056	K03761
1057	K01565
1058	K13021
1059	K11942
1060	K11049
1061	K02937
1062	K03575
1063	K09713
1064	K02155
1065	K00414
1066	K11273
1067	K14348
1068	K09384
1069	K10300
1070	K11925
1071	K14644
1072	K15045
1073	K00301
1074	K06864
1075	K15665
1076	K08083
1077	K00880
1078	K03428
1079	K08760
1080	K07776
1081	K02531
1082	K04759
1083	K14758
1084	K07773
1085	K09938
1086	K01780
1087	K14296
1088	K11521
1089	K01170
1090	K07653
1091	K03704
1092	K07605
1093	K02746
1094	K11136
1095	K02635
1096	K10454
1097	K12065
1098	K14703
1099	K08992
1100	K03724
1101	K00581
1102	K01787
1103	K03518
1104	K04708
1105	K11744
1106	K14097
1107	K05308
1108	K11618
1109	K01424
1110	K09735
1111	K06689
1112	K01220
1113	K10798
1114	K01636
1115	K14096
1116	K02385
1117	K03458
1118	K15365
1119	K12598
1120	K00299
1121	K03802
1122	K00577
1123	K15898
1124	K01067
1125	K02922
1126	K14122
1127	K08196
1128	K00725
1129	K01336
1130	K15173
1131	K01599
1132	K15451
1133	K03755
1134	K03191
1135	K09229
1136	K04431
1137	K00612
1138	K03050
1139	K00161
1140	K02480
1141	K09512
1142	K11177
1143	K11481
1144	K14115
1145	K11780
1146	K09477
1147	K15535
1148	K05367
1149	K15440
1150	K00220
1151	K15358
1152	K03537
1153	K08996
1154	K15102
1155	K05515
1156	K10708
1157	K08096
1158	K12761
1159	K05979
1160	K05655
1161	K06940
1162	K12234
1163	K11615
1164	K00865
1165	K14764
1166	K01942
1167	K07190
1168	K06068
1169	K04749
1170	K11154
1171	K07151
1172	K07512
1173	K03136
1174	K03674
1175	K02486
1176	K09985
1177	K02169
1178	K02173
1179	K10466
1180	K05957
1181	K08482
1182	K15894
1183	K13488
1184	K03591
1185	K00898
1186	K03496
1187	K05823
1188	K02949
1189	K01253
1190	K08139
1191	K10643
1192	K03222
1193	K10938
1194	K08600
1195	K06036
1196	K01666
1197	K05710
1198	K03267
1199	K09883
1200	K13589
1201	K01856
1202	K14154
1203	K01073
1204	K03030
1205	K09908
1206	K14670
1207	K01060
1208	K10598
1209	K01553
1210	K05544
1211	K12242
1212	K13015
1213	K04753
1214	K00208
1215	K05344
1216	K03051
1217	K01462
1218	K05864
1219	K07354
1220	K08255
1221	K05928
1222	K00354
1223	K07278
1224	K07117
1225	K14561
1226	K03300
1227	K00808
1228	K12453
1229	K00402
1230	K14161
1231	K15519
1232	K14667
1233	K03754
1234	K01869
1235	K14767
1236	K14335
1237	K02479
1238	K01499
1239	K11902
1240	K15728
1241	K11099
1242	K01161
1243	K09162
1244	K00167
1245	K04073
1246	K02968
1247	K10776
1248	K02900
1249	K02507
1250	K08261
1251	K11328
1252	K14729
1253	K03431
1254	K14299
1255	K15312
1256	K03649
1257	K07240
1258	K09497
1259	K02623
1260	K15655
1261	K11179
1262	K07784
1263	K02133
1264	K07267
1265	K13641
1266	K08075
1267	K15450
1268	K00044
1269	K02013
1270	K01165
1271	K01568
1272	K09504
1273	K04688
1274	K02791
1275	K06178
1276	K00274
1277	K14213
1278	K13529
1279	K15311
1280	K00443
1281	K08770
1282	K10220
1283	K01013
1284	K14387
1285	K06992
1286	K10068
1287	K11900
1288	K03230
1289	K09717
1290	K09516
1291	K02148
1292	K06897
1293	K11250
1294	K15726
1295	K00743
1296	K14861
1297	K01199
1298	K14566
1299	K00254
1300	K10781
1301	K01760
1302	K00646
1303	K15031
1304	K01008
1305	K02439
1306	K07684
1307	K03650
1308	K10553
1309	K06147
1310	K13935
1311	K12879
1312	K07585
1313	K01727
1314	K00614
1315	K03350
1316	K05874
1317	K13876
1318	K11322
1319	K09017
1320	K07780
1321	K10644
1322	K08860
1323	K12202
1324	K02848
1325	K09143
1326	K11127
1327	K02532
1328	K08489
1329	K01897
1330	K14124
1331	K02509
1332	K09154
1333	K01133
1334	K02022
1335	K13403
1336	K03708
1337	K08766
1338	K09116
1339	K09155
1340	K11641
1341	K09489
1342	K09890
1343	K13282
1344	K11041
1345	K01258
1346	K14119
1347	K09518
1348	K03280
1349	K12376
1350	K02076
1351	K11412
1352	K02102
1353	K12521
1354	K13010
1355	K08086
1356	K15681
1357	K01556
1358	K04056
1359	K00878
1360	K01283
1361	K14972
1362	K08364
1363	K14553
1364	K14118
1365	K00440
1366	K03187
1367	K08361
1368	K02572
1369	K10841
1370	K09988
1371	K08803
1372	K12143
1373	K14189
1374	K01371
1375	K14653
1376	K10737
1377	K06871
1378	K04963
1379	K05548
1380	K02511
1381	K13614
1382	K03830
1383	K10026
1384	K05587
1385	K08326
1386	K00583
1387	K01569
1388	K02686
1389	K00615
1390	K04411
1391	K01042
1392	K01909
1393	K00462
1394	K11630
1395	K02196
1396	K03319
1397	K15283
1398	K00582
1399	K00257
1400	K02705
1401	K07791
1402	K07744
1403	K15272
1404	K02123
1405	K11665
1406	K01036
1407	K12827
1408	K10352
1409	K07799
1410	K10400
1411	K00712
1412	K10877
1413	K11534
1414	K06914
1415	K12877
1416	K02704
1417	K14005
1418	K07392
1419	K05713
1420	K03483
1421	K01121
1422	K12988
1423	K02790
1424	K14120
1425	K04409
1426	K00580
1427	K01312
1428	K02989
1429	K03793
1430	K06223
1431	K14411
1432	K07396
1433	K05887
1434	K09736
1435	K02926
1436	K03408
1437	K15202
1438	K05582
1439	K04445
1440	K00042
1441	K05605
1442	K12987
1443	K06862
1444	K03320
1445	K03854
1446	K00584
1447	K15657
1448	K15395
1449	K07253
1450	K09570
1451	K14351
1452	K02618
1453	K03667
1454	K13820
1455	K00348
1456	K00695
1457	K13713
1458	K02237
1459	K00579
1460	K05581
1461	K13989
1462	K11937
1463	K01541
1464	K00196
1465	K02334
1466	K09498
1467	K12743
1468	K06865
1469	K07150
1470	K14195
1471	K08581
1472	K06596
1473	K00993
1474	K10777
1475	K11530
1476	K06370
1477	K04110
1478	K01275
1479	K15212
1480	K11531
1481	K10716
1482	K02690
1483	K01204
1484	K00953
1485	K07388
1486	K00918
1487	K01795
1488	K02626
1489	K00205
1490	K13611
1491	K01178
1492	K03675
1493	K11520
1494	K01796
1495	K02408
1496	K13503
1497	K02446
1498	K14497
1499	K15668
1500	K03031
1501	K15446
1502	K07342
1503	K01880
1504	K10432
1505	K14699
1506	K07066
1507	K07072
1508	K11057
1509	K11893
1510	K08851
1511	K01710
1512	K13126
1513	K00505
1514	K02227
1515	K02634
1516	K15430
1517	K11585
1518	K09978
1519	K07804
1520	K10460
1521	K15156
1522	K13279
1523	K01387
1524	K09655
1525	K07284
1526	K04429
1527	K09508
1528	K02786
1529	K01510
1530	K05773
1531	K14107
1532	K07672
1533	K04961
1534	K13540
1535	K05912
1536	K09583
1537	K01751
1538	K11953
1539	K03257
1540	K10562
1541	K12246
1542	K15653
1543	K00713
1544	K11636
1545	K02978
1546	K12673
1547	K09668
1548	K12369
1549	K02281
1550	K02670
1551	K08697
1552	K04430
1553	K14779
1554	K06125
1555	K00822
1556	K14188
1557	K04602
1558	K00032
1559	K06293
1560	K02056
1561	K14084
1562	K10782
1563	K11781
1564	K02997
1565	K08834
1566	K05586
1567	K11740
1568	K01744
1569	K13622
1570	K05546
1571	K05952
1572	K14106
1573	K10673
1574	K01799
1575	K06045
1576	K15711
1577	K01682
1578	K09509
1579	K15016
1580	K00264
1581	K08624
1582	K01995
1583	K13700
1584	K14940
1585	K11492
1586	K07578
1587	K11087
1588	K00228
1589	K15900
1590	K05579
1591	K01713
1592	K09724
1593	K03896
1594	K01610
1595	K08068
1596	K14100
1597	K12486
1598	K09530
1599	K06721
1600	K06148
1601	K06922
1602	K13601
1603	K09496
1604	K05645
1605	K00373
1606	K05711
1607	K09660
1608	K00800
1609	K15036
1610	K13665
1611	K11173
1612	K05653
1613	K08721
1614	K01401
1615	K12960
1616	K15912
1617	K14007
1618	K14110
1619	K03059
1620	K11209
1621	K05578
1622	K08855
1623	K14647
1624	K05666
1625	K09835
1626	K11203
1627	K09720
1628	K00559
1629	K00155
1630	K03983
1631	K14099
1632	K05355
1633	K15271
1634	K06243
1635	K06237
1636	K02475
1637	K04416
1638	K03981
1639	K15533
1640	K05709
1641	K10457
1642	K05972
1643	K02291
1644	K14101
1645	K02729
1646	K05572
1647	K02870
1648	K00442
1649	K07772
1650	K04116
1651	K08646
1652	K02491
1653	K14716
1654	K14652
1655	K14358
1656	K00374
1657	K02955
1658	K13058
1659	K03725
1660	K11747
1661	K08582
1662	K14475
1663	K03605
1664	K15019
1665	K08844
1666	K04618
1667	K12860
1668	K08279
1669	K02709
1670	K14092
1671	K13117
1672	K03053
1673	K00106
1674	K04333
1675	K13280
1676	K07051
1677	K04652
1678	K03655
1679	K01461
1680	K14565
1681	K00883
1682	K12420
1683	K12256
1684	K03088
1685	K09159
1686	K00504
1687	K02040
1688	K14724
1689	K01376
1690	K11329
1691	K08682
1692	K05636
1693	K05929
1694	K00726
1695	K02706
1696	K10242
1697	K15670
1698	K07942
1699	K03540
1700	K08982
1701	K12961
1702	K13734
1703	K14590
1704	K12741
1705	K09338
1706	K15584
1707	K10780
1708	K14290
1709	K02413
1710	K02703
1711	K04485
1712	K06626
1713	K02451
1714	K05708
1715	K00558
1716	K03037
1717	K06599
1718	K09148
1719	K12557
1720	K15437
1721	K10900
1722	K13679
1723	K00185
1724	K09991
1725	K01228
1726	K05387
1727	K03832
1728	K10556
1729	K01537
1730	K08687
1731	K02637
1732	K12342
1733	K01290
1734	K14982
1735	K06640
1736	K06901
1737	K10697
1738	K01400
1739	K07147
1740	K06046
1741	K01851
1742	K12508
1743	K15337
1744	K08680
1745	K06972
1746	K11084
1747	K09540
1748	K14941
1749	K11617
1750	K12248
1751	K00649
1752	K01347
1753	K03400
1754	K12289
1755	K15151
1756	K14692
1757	K09129
1758	K12292
1759	K13491
1760	K15449
1761	K00720
1762	K00624
1763	K15973
1764	K13124
1765	K08848
1766	K14082
1767	K13612
1768	K03639
1769	K13106
1770	K11738
1771	K06290
1772	K12317
1773	K03302
1774	K04655
1775	K08490
1776	K03252
1777	K00781
1778	K10683
1779	K13486
1780	K01632
1781	K13338
1782	K13024
1783	K01264
1784	K03918
1785	K08305
1786	K05299
1787	K10943
1788	K06930
1789	K12374
1790	K11356
1791	K13987
1792	K05886
1793	K00242
1794	K03615
1795	K01047
1796	K13853
1797	K02304
1798	K01674
1799	K03955
1800	K09803
1801	K08653
1802	K10552
1803	K05637
1804	K06013
1805	K11648
1806	K00817
1807	K11681
1808	K11658
1809	K05831
1810	K08057
1811	K04523
1812	K04027
1813	K15917
1814	K14159
1815	K07569
1816	K14568
1817	K00189
1818	K14269
1819	K05849
1820	K03778
1821	K12382
1822	K15719
1823	K03539
1824	K05673
1825	K08363
1826	K09461
1827	K01841
1828	K06698
1829	K05828
1830	K00945
1831	K08670
1832	K07716
1833	K13195
1834	K05345
1835	K05757
1836	K07233
1837	K00620
1838	K12278
1839	K00125
1840	K02144
1841	K02344
1842	K02230
1843	K08961
1844	K12454
1845	K14402
1846	K13107
1847	K13743
1848	K10550
1849	K00153
1850	K09764
1851	K01233
1852	K11833
1853	K13951
1854	K03653
1855	K15783
1856	K14852
1857	K05827
1858	K11856
1859	K05716
1860	K07268
1861	K15641
1862	K11540
1863	K01361
1864	K00517
1865	K09906
1866	K13302
1867	K14388
1868	K12790
1869	K07075
1870	K12476
1871	K10241
1872	K11139
1873	K03093
1874	K14776
1875	K12399
1876	K03196
1877	K07652
1878	K13632
1879	K12789
1880	K03813
1881	K13048
1882	K04460
1883	K06913
1884	K03606
1885	K03511
1886	K08164
1887	K01085
1888	K07171
1889	K01135
1890	K05096
1891	K12668
1892	K15047
1893	K13483
1894	K04444
1895	K01453
1896	K15505
1897	K12788
1898	K15888
1899	K07497
1900	K00224
1901	K09771
1902	K14775
1903	K12625
1904	K14108
1905	K10402
1906	K12800
1907	K12787
1908	K07080
1909	K03818
1910	K12136
1911	K05830
1912	K10667
1913	K00850
1914	K14548
1915	K08710
1916	K11724
1917	K11647
1918	K11147
1919	K10027
1920	K08002
1921	K10689
1922	K03820
1923	K14057
1924	K08775
1925	K07344
1926	K12786
1927	K13108
1928	K09522
1929	K01415
1930	K02761
1931	K01865
1932	K09577
1933	K00218
1934	K07763
1935	K12735
1936	K12896
1937	K03911
1938	K08977
1939	K06858
1940	K12785
1941	K12468
1942	K11920
1943	K09697
1944	K04494
1945	K01097
1946	K01093
1947	K03372
1948	K10555
1949	K06795
1950	K07813
1951	K01915
1952	K03972
1953	K00483
1954	K15125
1955	K12784
1956	K07807
1957	K03779
1958	K03363
1959	K07904
1960	K03811
1961	K00103
1962	K15792
1963	K02011
1964	K15892
1965	K13829
1966	K12247
1967	K11935
1968	K12585
1969	K11008
1970	K05953
1971	K12876
1972	K00060
1973	K03262
1974	K02209
1975	K11007
1976	K00539
1977	K10007
1978	K01855
1979	K02052
1980	K09132
1981	K14841
1982	K11006
1983	K05779
1984	K10797
1985	K00154
1986	K12962
1987	K10458
1988	K06118
1989	K00112
1990	K12397
1991	K09804
1992	K13654
1993	K09953
1994	K09472
1995	K07718
1996	K09963
1997	K09422
1998	K02363
1999	K07304
[truncated: 4,972 more rows]
